# Supplementary material for: A novel murine model of combined hepatocellular carcinoma and intrahepatic cholangiocarcinoma
Source: Springer Nature journal article supplement (doi:10.1186/s12967-022-03791-z), 2022-12-09
Supplement: MOESM1 [file 23809016]

A

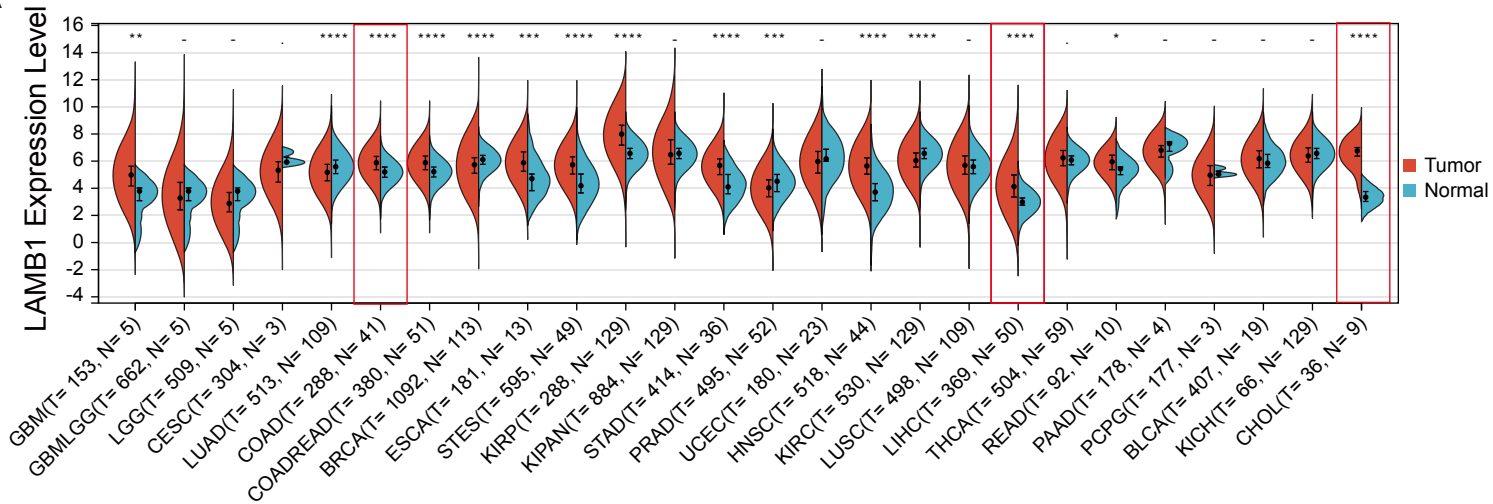

B

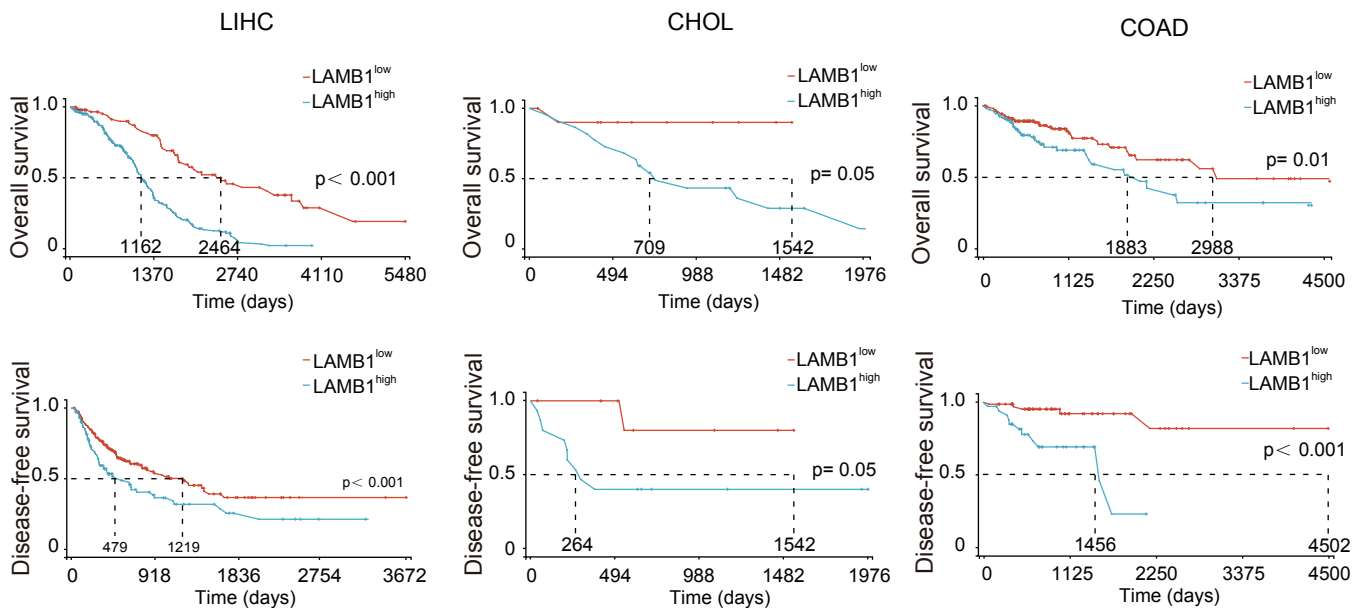

Supplementary Figure 1. **Multi-cancer analysis of the expression and prognostic role of LAMB1.** (A) LAMB1 is significantly upregulated in multiple cancer types from TCGA data. (B) Kaplan-Meier analysis of the association between LAMB1 expression and OS or DFS in LIHC, CHOL, and COAD datasets.

**A**

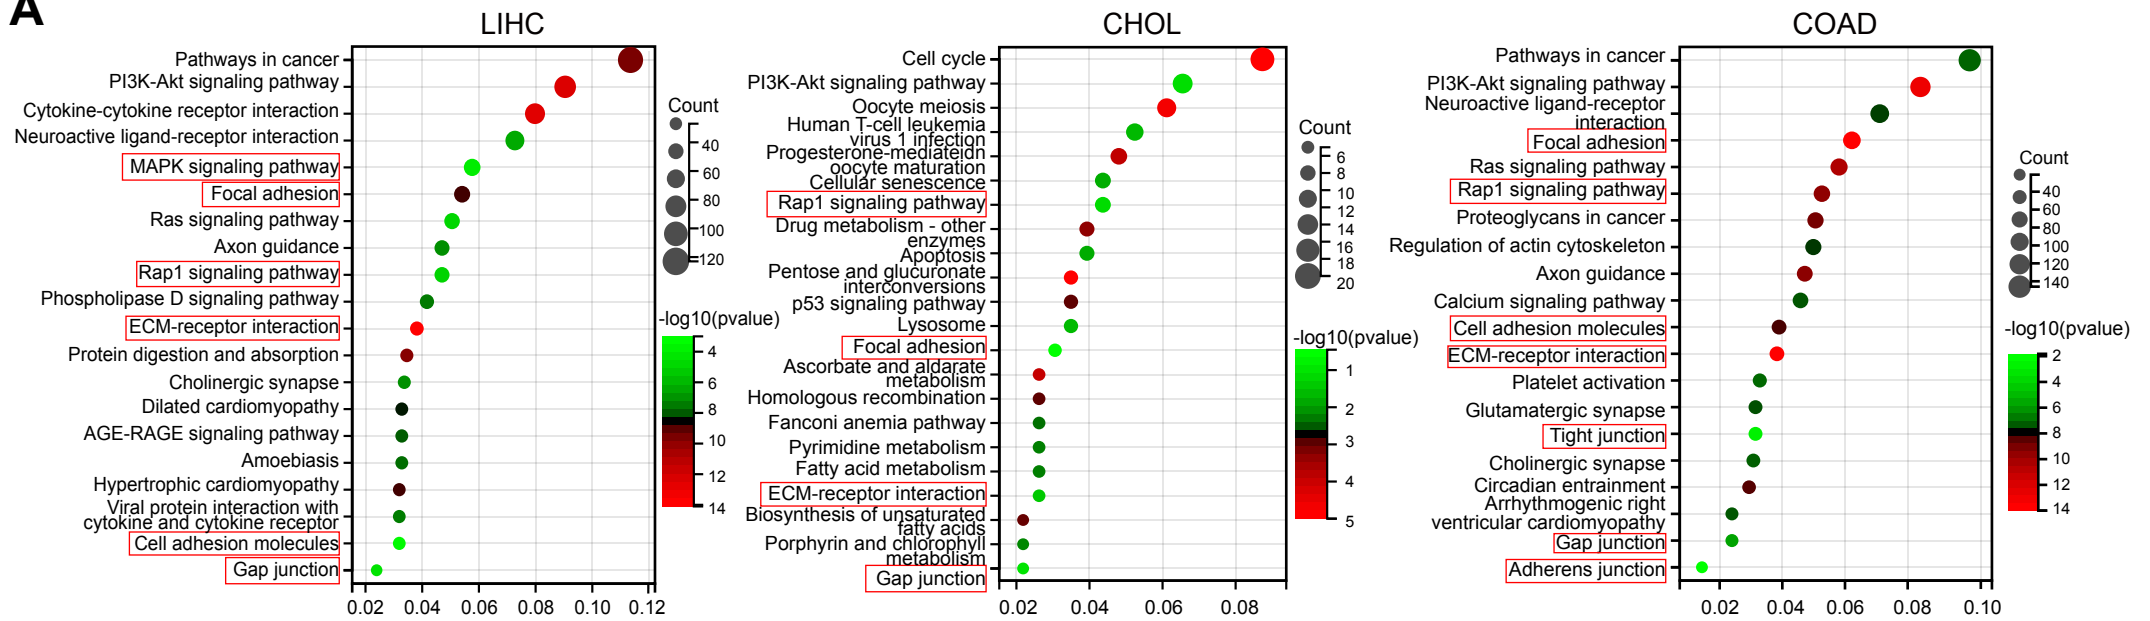

**B**

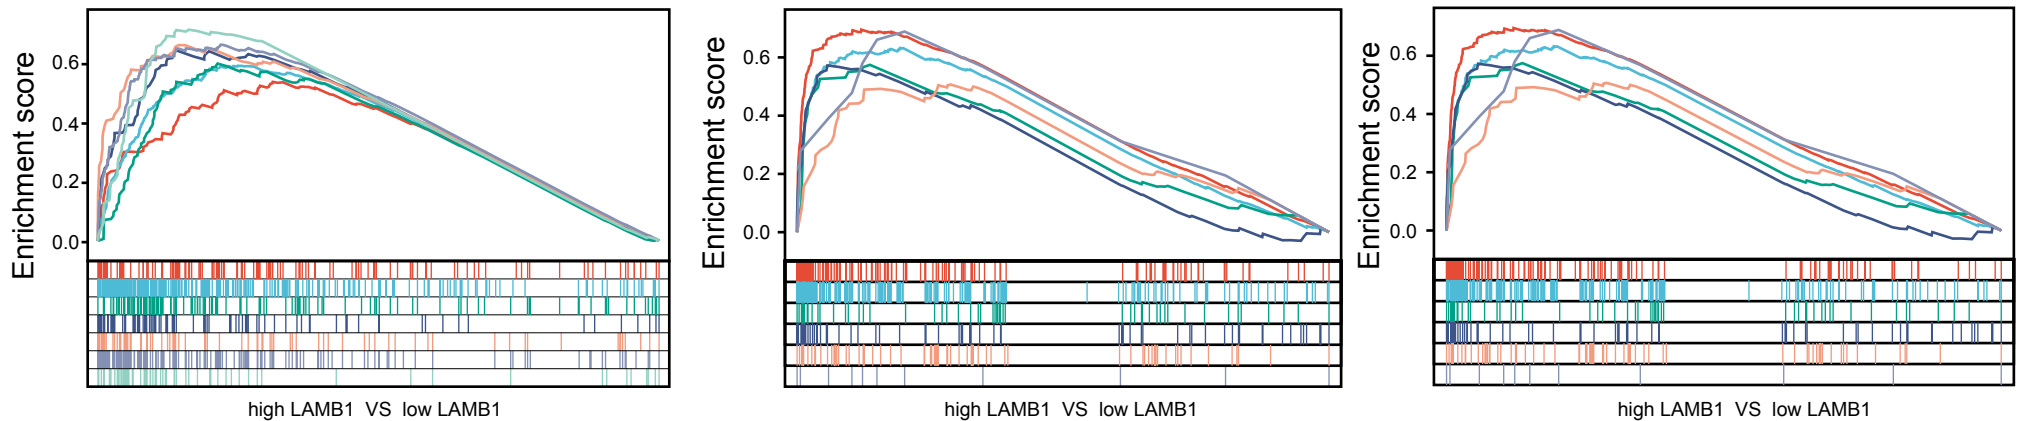

| Pathway                      | NES   | p-value |
|------------------------------|-------|---------|
| CELL_ADHESION_MOLECULES_CAMS | 1.707 | < 0.001 |
| MAPK_SIGNALING_PATHWAY       | 2.014 | < 0.001 |
| TIGHT_JUNCTION               | 1.999 | < 0.001 |
| GAP_JUNCTION                 | 1.996 | < 0.001 |
| ECM_RECEPTOR_INTERACTION     | 2.014 | < 0.001 |
| FOCAL ADHESION               | 2.094 | < 0.001 |
| ADHERENS JUNCTION            | 2.005 | < 0.001 |

| Pathway                                     | NES   | p-value |
|---------------------------------------------|-------|---------|
| SARRIO_EPITHELIAL_MESENCHYMAL_TRANSITION_UP | 1.866 | 0.004   |
| BIDUS_METASTASIS_UP                         | 1.781 | 0.004   |
| SUNG_METASTASIS_STROMA_DN                   | 1.679 | 0.008   |
| RAMASWAMY_METASTASIS_UP                     | 1.673 | 0.016   |
| RIZKI_TUMOR_INVASIVENESS_2D_UP              | 1.564 | 0.027   |
| GOUYER_TUMOR_INVASIVENESS                   | 1.555 | 0.032   |

| Pathway                  | NES   | p-value |
|--------------------------|-------|---------|
| ADHERENS_JUNCTION        | 1.939 | < 0.001 |
| FOCAL_ADHESION           | 1.916 | < 0.001 |
| GAP_JUNCTION             | 1.907 | < 0.001 |
| TIGHT_JUNCTION           | 1.954 | < 0.001 |
| MAPK_SIGNALING_PATHWAY   | 1.969 | < 0.001 |
| ECM_RECEPTOR_INTERACTION | 1.718 | 0.045   |

Supplementary Figure 2 **Multi-cancer analysis of biological functions and significant pathway of LAMB1.** (A) Top 20 pathways enriched in the KEGG analysis in LIHC, CHOL, and COAD datasets. The red box represents pro-metastatic processes, including focal adhesion, ECM-receptor interaction, and cellular junction. (B) GESA analysis of gene signatures of indicated pathways in LIHC, CHOL, and COAD datasets.
